# Supplementary material for: p14ARF interacts with the focal adhesion kinase and protects cells from anoikis
Source: PubMed Central journal article supplement (PMC5582215; doi:10.1038/onc.2017.104), 2017-04-24
Supplement: onc2017104x1.pdf [file onc2017104x1.pdf]

Fig S1

a

p14ARF CMV

ARF

F-ACTIN

DAPI

ARF/F-actin  
MERGE

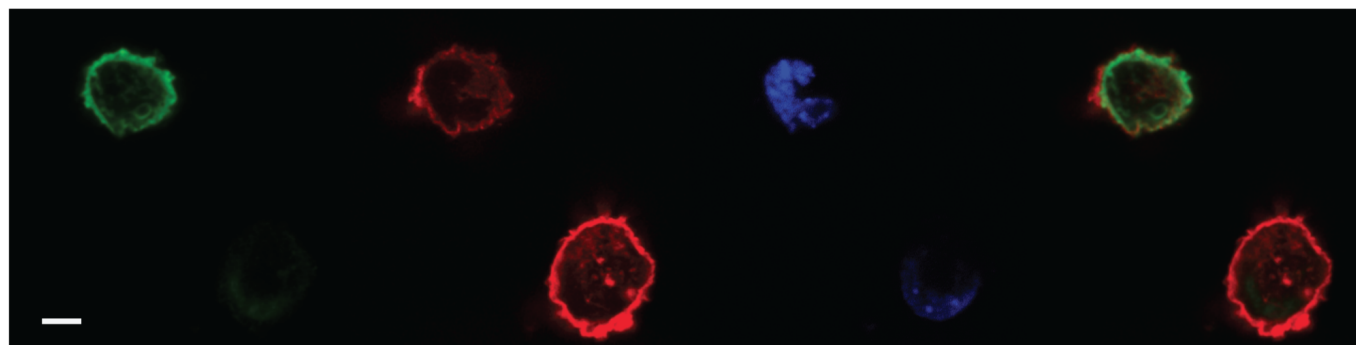

ARF 14PO2

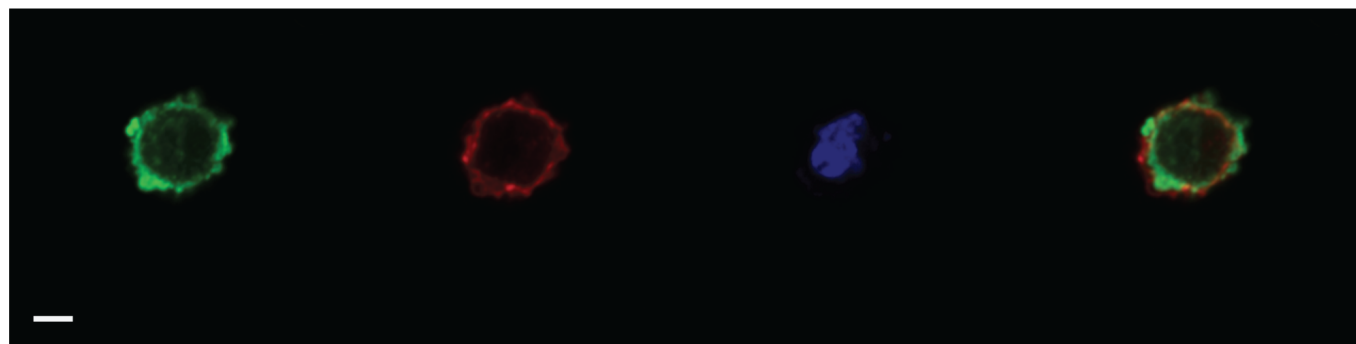

ARF 4C6/4

b

GFP::p14ARF

GFP

F-ACTIN

DAPI

GFP/F-actin  
MERGE

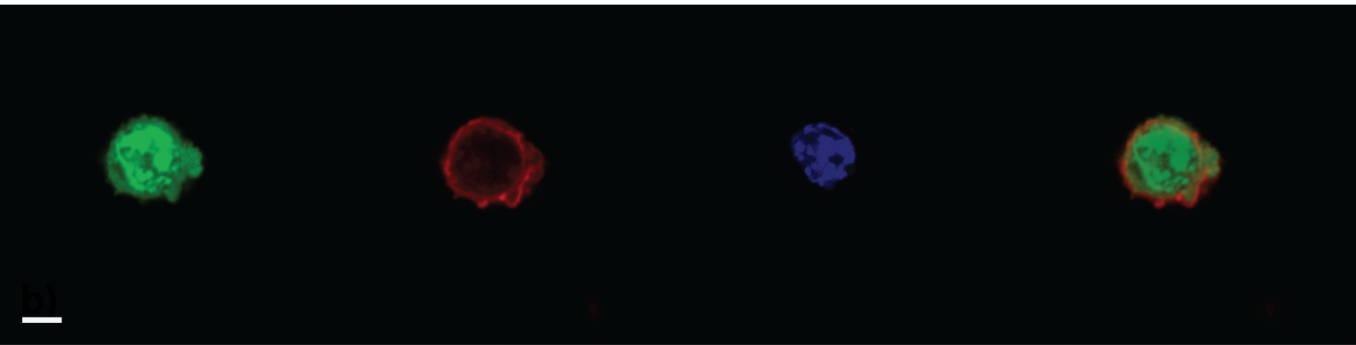

30'

IF with anti ARF 14P02

ARF

F-ACTIN

DAPI

ARF/F-actin  
MERGE

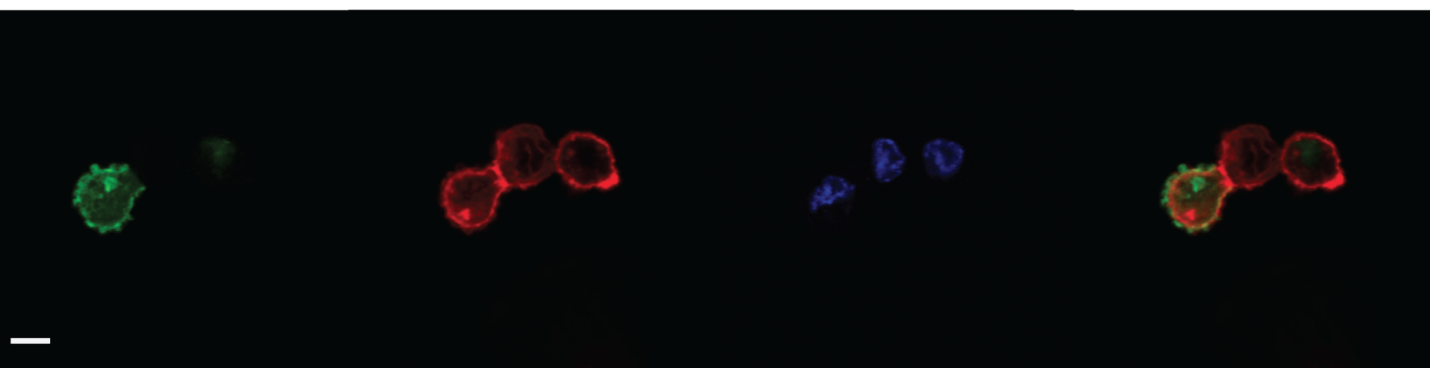

30'
