# Supplementary material for: p14ARF interacts with the focal adhesion kinase and protects cells from anoikis
Source: PubMed Central journal article supplement (PMC5582215; doi:10.1038/onc.2017.104), 2017-04-24

Fig S2

**f-actin- ARF** localization 3D matrigel

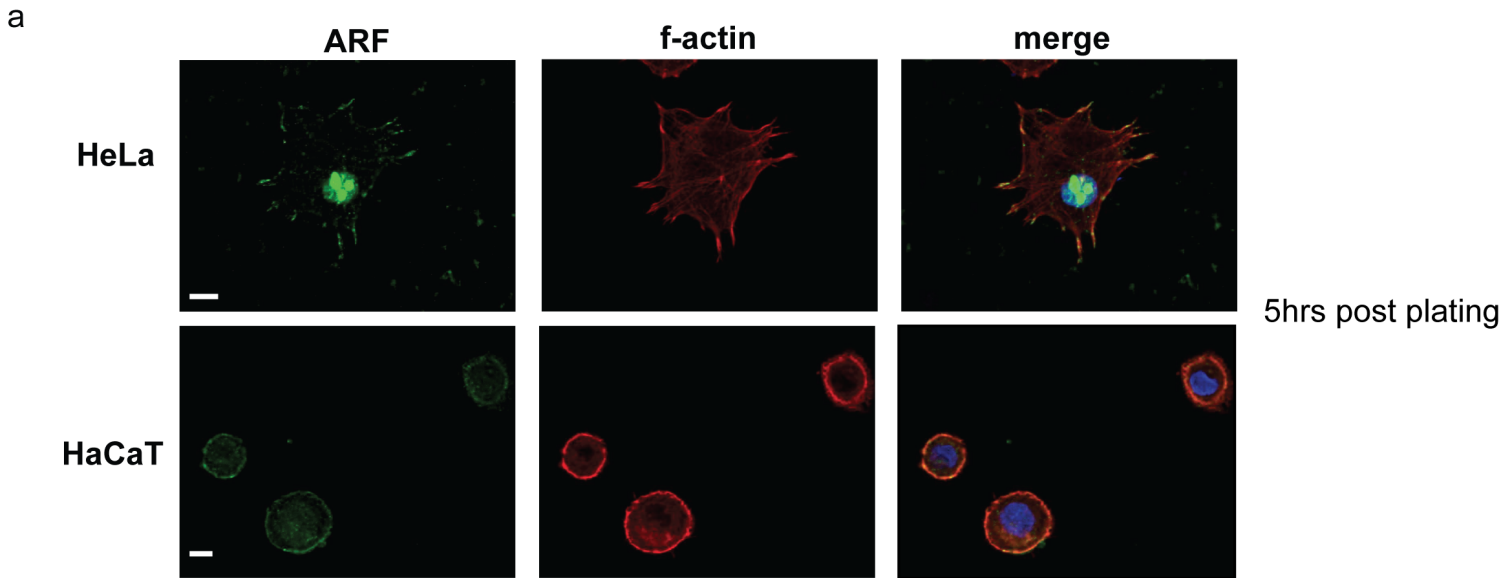

b

**ARF- B23** localization time course replating

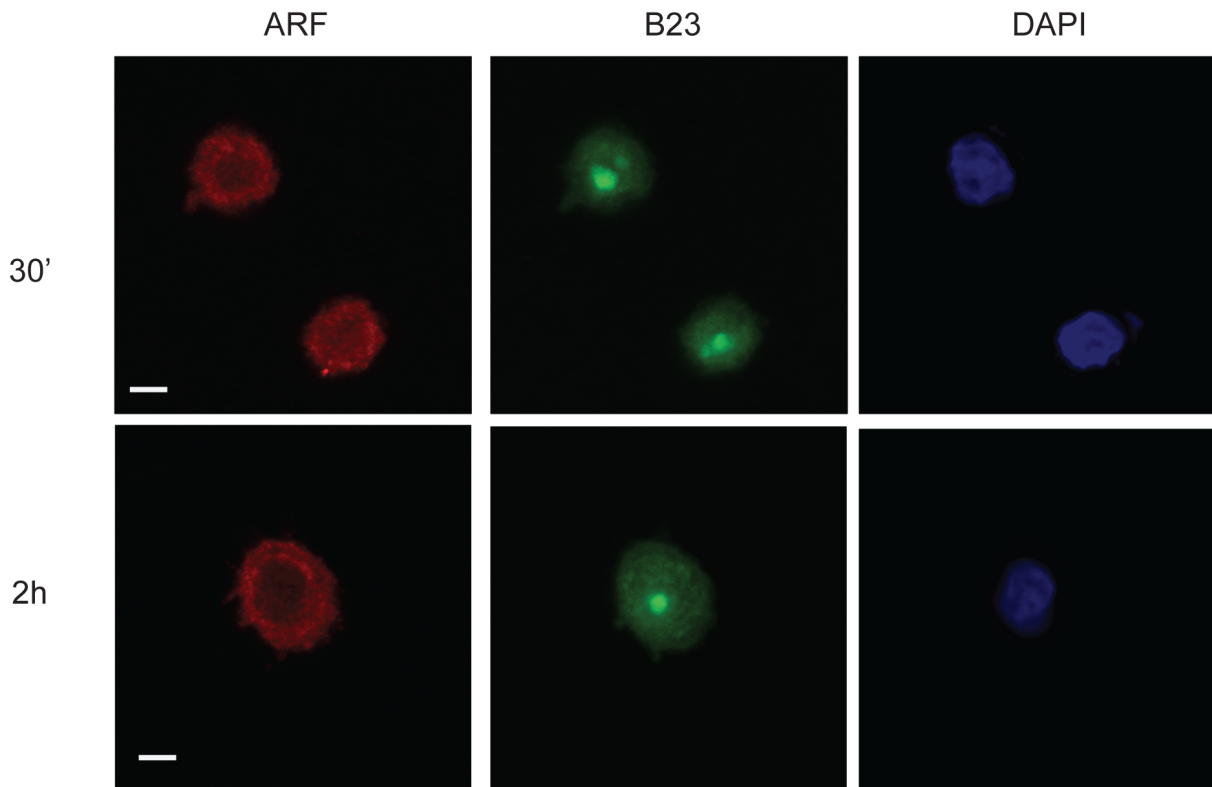

Supplement: onc2017104x2.pdf [file onc2017104x2.pdf]
