# Supplementary material for: p14ARF interacts with the focal adhesion kinase and protects cells from anoikis
Source: PubMed Central journal article supplement (PMC5582215; doi:10.1038/onc.2017.104), 2017-04-24

**Fig S4**

**EFFECT OF DIFFERENT ARF TARGETING siRNA ON p14ARF and p16INK4a LEVELS**

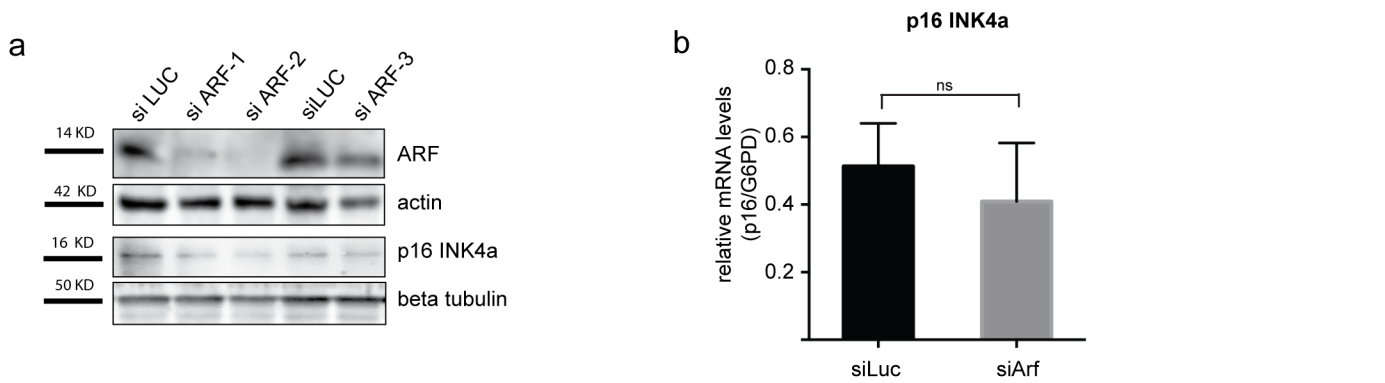

**c**

**EFFECT OF DIFFERENT ARF siRNAs ON CELL SPREADING**

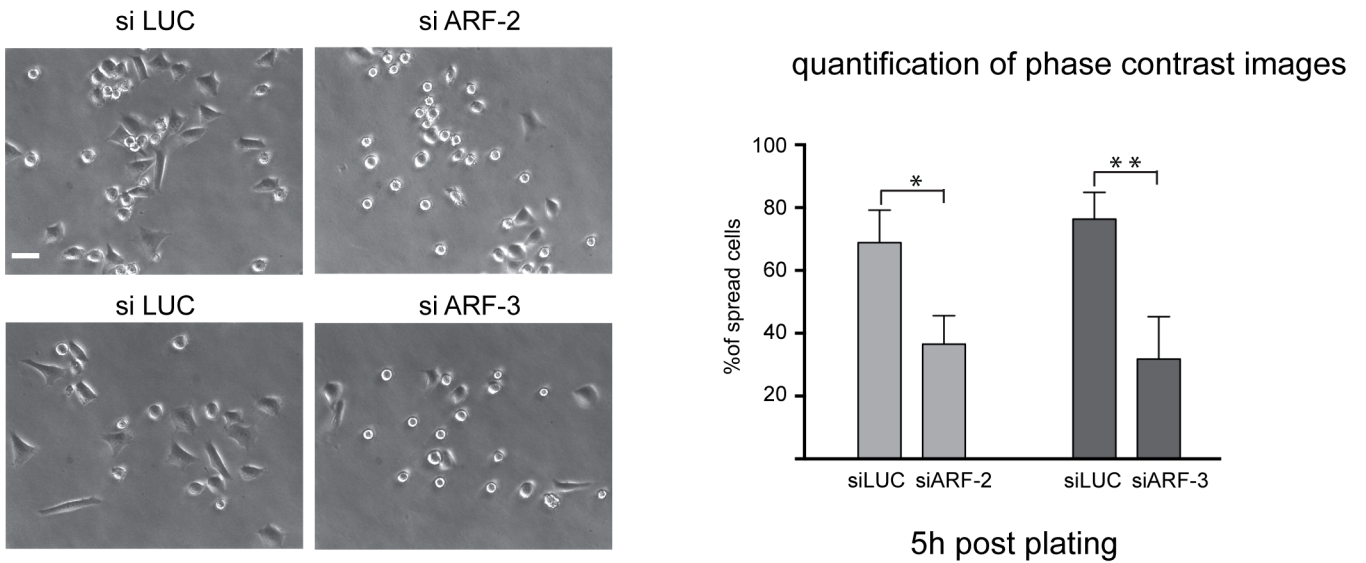

phase contrast images

**d**

**p16 siRNA DOES NOT AFFECT HELA CELL SPREADING**

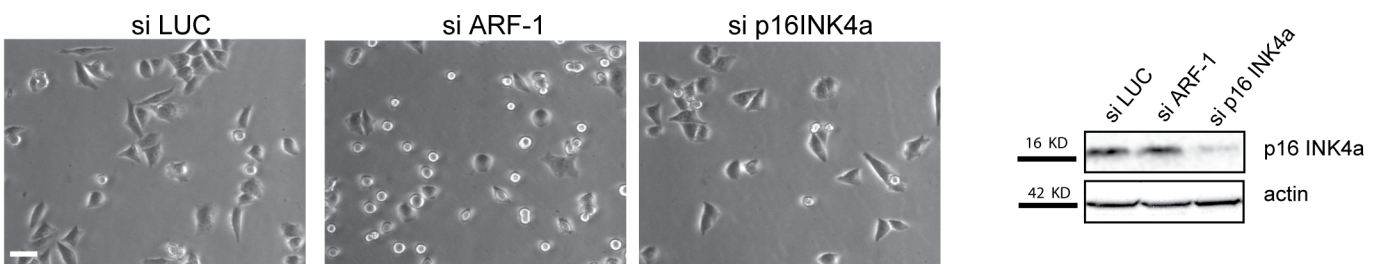

Supplement: onc2017104x4.pdf [file onc2017104x4.pdf]
