# Supplementary material for: p14ARF interacts with the focal adhesion kinase and protects cells from anoikis
Source: PubMed Central journal article supplement (PMC5582215; doi:10.1038/onc.2017.104), 2017-04-24

Fig S5

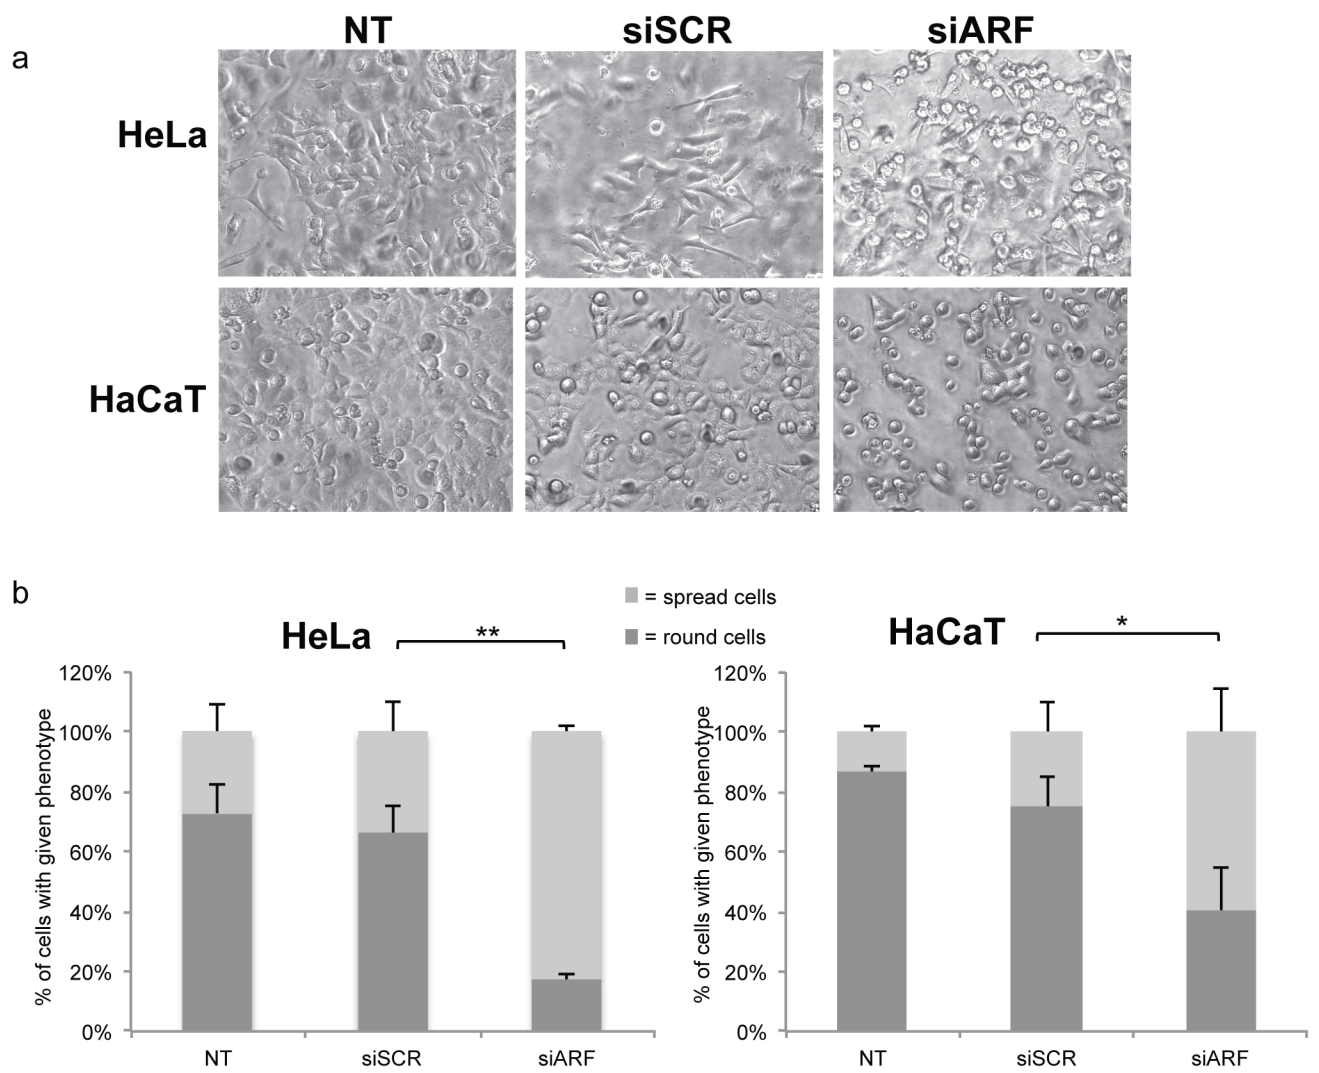

Supplement: onc2017104x5.pdf [file onc2017104x5.pdf]
