# Supplementary material for: p14ARF interacts with the focal adhesion kinase and protects cells from anoikis
Source: PubMed Central journal article supplement (PMC5582215; doi:10.1038/onc.2017.104), 2017-04-24

Fig S6

a

p19ARF

ARF

F-ACTIN

DAPI

ARF/F-actin MERGE

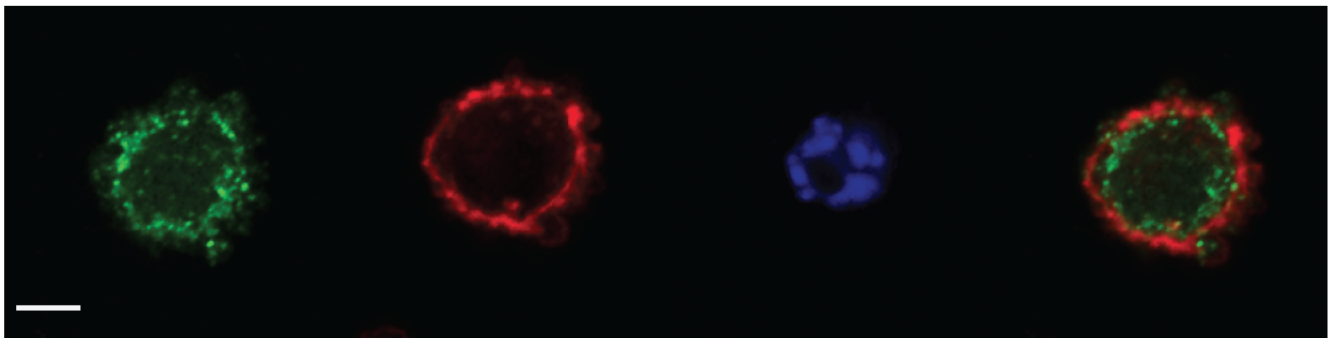

b

IP anti FAK  
WB anti pFAK Y397

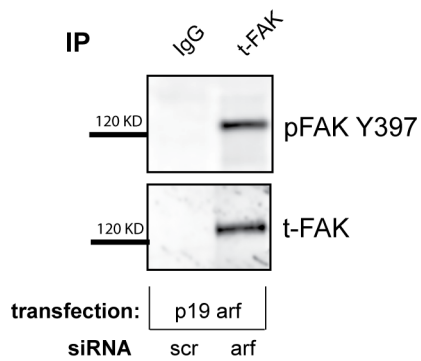

input

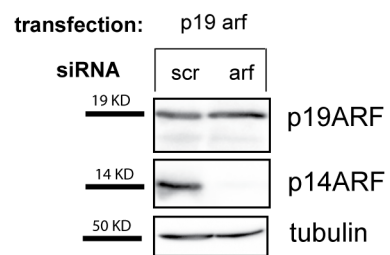

Supplement: onc2017104x6.pdf [file onc2017104x6.pdf]
